# Supplementary material for: CD Maps—Dynamic Profiling of CD1–CD100 Surface Expression on Human Leukocyte and Lymphocyte Subsets
Source: Front Immunol. 2019 Oct 23;10:2434. doi: 10.3389/fimmu.2019.02434 (PMC6820661; doi:10.3389/fimmu.2019.02434)
Supplement: Supplementary file 14 [file Table_5.xlsx]

## Sheet: Sheet1
Supplementary Table 5. Table listing order of CD markers per population in same order as in Supplementary Figure 6, rising median value of Median ABC. Markers in bold are markers right to the vertical lines in Supp Fig 6
MedABC
Neutro	CD42a, CD41, CD9, CD49b, CD52, CD26, CD27, CD42b, CD30, CD29, CD49c, CD49a, CD2, CD6, CD85j, CD23, CD62P, CD57, CD51, CD14, FMO, CD1a, CD5, CD1d, CD62E, CD8_MEM-31, CD3_UCHT1, CD84, CD7, CD71, CD91, CD21, CD70, CD69, CD73, CD25, CD20, CD72, CD56_LT56, CD90, CD83, CD34, CD86, CD28, CD4_MEM-241, CD79a, CD64, CD45RA, CD68, CD79b, CD98, CD80, CD39, CD49d, CD85k, CD61, CD3_HIT3a, CD8_HIT8a, CD74, CD49…
Eosin	CD42a, CD41, CD16, CD49b, CD62P, CD42b, CD27, CD85j, CD49c, CD49a, CD30, CD52, CD14, CD8_MEM-31, CD62E, CD23, CD26, CD83, CD34, CD3_UCHT1, CD2, CD6, CD64, CD1a, CD1d, CD29, CD51, CD57, CD90, CD10, CD80, CD45RA, CD86, CD72, CD61, FMO, CD7, CD79b, CD70, CD73, CD85k, CD5, CD79a, CD74, CD91, CD69, CD68, CD56_LT56, CD21, CD25, CD96, CD4_MEM-241, CD20, CD28, CD3_HIT3a, CD49e, CD93, CD62L, CD51_61, CD8_…
Baso	CD42a, CD42b, CD16, CD49f, CD66c, CD85j, CD41, CD29, CD49b, CD62P, CD30, CD27, CD14, CD64, CD39, CD24, CD57, CD49c, CD49a, CD23, CD1d, CD10, CD51, CD74, CD93, CD80, CD62E, CD72, CD83, CD6, CD79b, CD1a, FMO, CD96, CD73, CD5, CD86, CD85k, CD90, CD79a, CD21, CD56_LT56, CD91, CD69, CD8_MEM-31, CD89, CD20, CD70, CD45RA, CD7, CD85d, CD68, CD4_MEM-241, CD28, CD2, CD34, CD3_UCHT1, CD66a_c_d_e, CD45RB, CD…
classMono	CD27, CD42a, CD26, CD30, CD49c, CD10, CD66c, CD49a, CD57, CD29, FMO, CD23, CD66a_c_d_e, CD6, CD1a, CD5, CD73, CD7, CD90, CD72, CD80, CD62E, CD21, CD42b, CD70, CD25, CD83, CD20, CD79a, CD68, CD24, CD79b, CD3_UCHT1, CD49b, CD69, CD8_MEM-31, CD28, CD16, CD96, CD34, CD8_HIT8a, CD49f, CD1b, CD62L, CD62P, CD51_61, CD2, CD51, CD56_LT56, CD40, CD22, CD45RA, CD19, CD37, CD71, CD39, CD74, CD91, CD9, CD3_HI…
interMono	CD27, CD26, CD49c, CD30, CD49a, CD42a, CD57, CD1a, CD23, CD6, CD49b, FMO, CD7, CD73, CD5, CD29, CD62E, CD80, CD20, CD21, CD79a, CD25, CD70, CD72, CD3_UCHT1, CD69, CD90, CD68, CD62P, CD42b, CD8_MEM-31, CD10, CD79b, CD83, CD51, CD96, CD2, CD56_LT56, CD8_HIT8a, CD1b, CD49f, CD66a_c_d_e, CD66c, CD34, CD28, CD51_61, CD24, CD22, CD62L, CD19, CD71, CD40, CD74, CD37, CD39, CD1d, CD95, CD91, CD84, CD9, CD…
noncMono	CD42a, CD49b, CD41, CD9, CD27, CD30, CD29, CD49c, CD49a, CD26, CD51, CD62P, CD49f, CD10, CD6, CD2, CD42b, CD66c, FMO, CD62E, CD57, CD3_UCHT1, CD1a, CD34, CD23, CD69, CD14, CD79b, CD80, CD5, CD72, CD70, CD90, CD20, CD39, CD79a, CD7, CD24, CD56_LT56, CD83, CD25, CD45RO, CD68, CD8_MEM-31, CD21, CD73, CD28, CD66a_c_d_e, CD1b, CD96, CD1d, CD62L, CD8_HIT8a, CD51_61, CD61, CD59, CD93, CD64, CD91, CD84, …
NK	CD42a, CD41, CD9, CD42b, CD62P, CD35, CD49b, CD13, CD64, CD66c, CD14, CD10, CD30, CD29, CD27, CD24, CD66a_c_d_e, CD26, CD49c, CD39, CD62E, CD1a, CD49a, CD23, CD83, CD51, CD45RO, CD71, CD61, CD89, CD34, CD1d, FMO, CD73, CD80, CD93, CD86, CD84, CD90, CD74, CD5, CD79b, CD21, CD72, CD91, CD85k, CD79a, CD20, CD70, CD68, CD25, CD69, CD85d, CD4_MEM-241, CD28, CD33, CD1b, CD85j, CD62L, CD3_HIT3a, CD51_61…
mDC	CD42a, CD41, CD42b, CD29, CD10, CD66c, CD9, CD66a_c_d_e, CD27, CD62P, CD49a, CD30, CD49c, CD49b, CD57, CD23, CD49f, FMO, CD24, CD14, CD62E, CD61, CD90, CD1a, CD80, CD8_MEM-31, CD35, CD7, CD89, CD69, CD79a, CD83, CD68, CD70, CD16, CD51, CD21, CD20, CD79b, CD96, CD73, CD25, CD51_61, CD3_UCHT1, CD56_LT56, CD26, CD6, CD8_HIT8a, CD91, CD72, CD1b, CD39, CD5, CD28, CD93, CD40, CD85d, CD34, CD3_HIT3a, CD…
pDC	CD41, CD42a, CD16, CD42b, CD62P, CD66c, CD3_UCHT1, CD95, CD11b, CD9, CD49b, CD29, CD66a_c_d_e, CD64, CD13, CD89, CD49f, CD27, CD49a, CD35, CD14, CD30, CD57, CD45RO, CD49c, CD24, CD6, CD39, CD1a, CD83, CD62E, CD1d, CD8_MEM-31, FMO, CD23, CD80, CD51, CD8_HIT8a, CD79b, CD91, CD69, CD90, CD21, CD56_LT56, CD68, CD61, CD25, CD11c, CD72, CD7, CD70, CD73, CD79a, CD20, CD10, CD96, CD5, CD1b, CD93, CD51_61…
Lymphs	CD41, CD42a, CD9, CD66c, CD10, CD30, CD62P, CD42b, CD23, CD66a_c_d_e, CD61, CD49a, CD57, CD90, CD68, CD49b, CD91, CD79a, CD39, CD16, CD62E, CD19, CD1a, FMO, CD1d, CD20, CD69, CD29, CD89, CD51_61, CD72, CD56_LT56, CD80, CD40, CD24, CD1b, CD51, CD22, CD66b, CD88, CD64, CD34, CD11c, CD70, CD25, CD85d, CD21, CD93, CD86, CD13, CD85k, CD49c, CD35, CD33, CD87, CD32, CD15, CD71, CD36, CD85j, CD83, CD11b,…
T	CD16, CD41, CD42a, CD9, CD62P, CD66c, CD10, CD35, CD30, CD24, CD32, CD39, CD23, CD42b, CD57, CD1d, CD66a_c_d_e, CD11c, CD49a, CD61, CD88, CD91, CD20, CD62E, CD68, CD79a, CD90, CD49b, CD56_LT56, CD1a, CD72, CD33, CD89, CD40, CD22, CD19, CD34, CD64, CD69, CD11b, CD51_61, CD80, CD1b, CD93, CD85d, CD85j, CD86, CD51, FMO, CD21, CD70, CD66b, CD13, CD29, CD85k, CD71, CD15, CD87, CD25, CD36, CD37, CD74, …
Tgd	CD41, CD42a, CD9, CD62P, CD35, CD66c, CD10, CD24, CD66a_c_d_e, CD42b, CD16, CD61, CD29, CD88, CD39, CD33, CD23, CD1d, CD91, CD49b, CD49a, CD72, CD68, CD62E, CD30, CD90, CD64, CD34, FMO, CD1a, CD32, CD19, CD79a, CD21, CD51, CD93, CD25, CD85d, CD13, CD70, CD22, CD40, CD56_LT56, CD89, CD11c, CD66b, CD80, CD20, CD85k, CD51_61, CD86, CD1b, CD4_RPA-T4, CD87, CD15, CD71, CD49c, CD79b, CD74, CD36, CD69, …
TCD4	CD16, CD41, CD42a, CD9, CD62P, CD10, CD42b, CD35, CD30, CD66c, CD24, CD39, CD57, CD49a, CD32, CD1d, CD23, CD66a_c_d_e, CD31, CD11c, CD90, CD91, CD61, CD68, CD62E, CD20, CD56_LT56, CD79a, CD88, CD69, CD72, CD89, CD11b, CD49b, CD33, CD1a, CD40, CD64, CD22, CD19, CD34, CD86, CD51_61, CD85j, CD63, CD93, CD8_HIT8a, CD85d, CD21, CD80, CD51, CD1b, CD85k, CD70, CD66b, FMO, CD87, CD8_MEM-31, CD13, CD73, C…
TCD4naive	CD16, CD41, CD29, CD42a, CD9, CD62P, CD10, CD42b, CD35, CD30, CD69, CD49a, CD66c, CD24, CD89, CD39, CD57, CD32, CD11b, CD1d, CD23, CD63, CD45RO, CD49b, CD87, CD66a_c_d_e, CD11c, CD90, CD91, CD61, CD72, CD68, CD20, CD62E, CD88, CD70, CD56_LT56, CD33, CD79a, CD64, CD34, CD1a, CD51_61, CD80, CD51, CD85j, CD40, CD85k, CD22, CD19, CD93, CD86, CD84, CD13, CD71, CD25, CD85d, CD8_HIT8a, CD1b, CD74, CD49c…
TCD4CM	CD16, CD41, CD42a, CD9, CD62P, CD10, CD62E, CD35, CD32, CD30, CD66c, CD24, CD57, CD39, CD1d, CD23, CD31, CD42b, CD49a, CD90, CD66a_c_d_e, CD11c, CD61, CD8_MEM-31, CD20, CD88, CD91, CD68, CD56_LT56, CD79a, CD49b, CD33, CD51_61, CD72, CD89, CD8_HIT8a, CD1a, CD34, CD11b, CD22, CD40, CD19, CD21, CD69, CD64, CD85j, CD80, CD85d, CD86, CD1b, CD93, CD63, CD70, CD51, CD66b, CD74, CD85k, FMO, CD13, CD15, C…
TCD4EM	CD16, CD41, CD42a, CD9, CD62P, CD10, CD35, CD32, CD30, CD42b, CD24, CD62E, CD66c, CD31, CD39, CD23, CD1d, CD57, CD90, CD66a_c_d_e, CD11c, CD61, CD20, CD88, CD72, CD51_61, CD91, CD79a, CD68, CD34, CD33, CD49b, CD49a, CD56_LT56, CD40, CD1a, CD22, CD19, CD64, CD89, CD8_HIT8a, CD21, CD27, CD8_MEM-31, CD86, CD93, CD85j, CD80, CD69, CD85d, CD1b, CD38, CD66b, CD51, CD45RA, CD62L, CD85k, FMO, CD37, CD73,…
TCD4TEMRA	CD41, CD42a, CD9, CD62P, CD35, CD10, CD66c, CD42b, CD90, CD23, CD66a_c_d_e, CD31, CD61, CD1d, CD49a, CD30, CD68, CD24, CD11c, CD89, CD39, CD49b, CD62E, CD19, CD22, CD79a, CD20, CD34, CD72, CD51_61, CD1a, CD91, CD64, CD21, CD40, CD33, CD85d, CD56_LT56, CD88, CD32, CD16, FMO, CD69, CD80, CD57, CD66b, CD27, CD51, CD86, CD85j, CD70, CD13, CD15, CD87, CD85k, CD93, CD25, CD1b, CD36, CD62L, CD74, CD73, …
TCD8	CD41, CD16, CD42a, CD9, CD49b, CD66c, CD35, CD62P, CD10, CD24, CD66a_c_d_e, CD42b, CD30, CD61, CD29, CD88, CD39, CD1d, CD23, CD32, CD91, CD68, CD72, CD49a, CD1a, CD33, CD79a, FMO, CD62E, CD19, CD13, CD90, CD11c, CD93, CD34, CD64, CD25, CD40, CD51, CD57, CD70, CD20, CD22, CD56_LT56, CD89, CD86, CD11b, CD51_61, CD80, CD69, CD66b, CD1b, CD71, CD85d, CD21, CD85k, CD4_RPA-T4, CD4_MEM-241, CD15, CD85j,…
TCD8naive	CD16, CD41, CD42a, CD62P, CD49b, CD9, CD66c, CD10, CD35, CD29, CD24, CD11b, CD45RO, CD66a_c_d_e, CD57, CD42b, CD30, CD13, CD39, CD32, CD11c, CD49a, CD91, CD61, CD88, CD1d, CD23, CD62E, CD90, CD68, CD33, CD20, FMO, CD89, CD69, CD51_61, CD63, CD1a, CD34, CD64, CD25, CD19, CD72, CD51, CD56_LT56, CD93, CD40, CD70, CD1b, CD79a, CD22, CD87, CD85j, CD80, CD85d, CD86, CD4_RPA-T4, CD71, CD66b, CD49c, CD85…
TCD8CM	CD16, CD41, CD35, CD42a, CD9, CD49b, CD30, CD66c, CD62P, CD10, CD32, CD66a_c_d_e, CD24, CD62E, CD23, CD42b, CD39, CD61, CD1d, CD88, CD68, CD91, CD21, CD1a, CD34, CD72, CD79a, CD64, CD33, CD87, CD4_MEM-241, CD51_61, FMO, CD80, CD93, CD51, CD40, CD85d, CD11b, CD85j, CD49a, CD90, CD13, CD11c, CD22, CD56_LT56, CD29, CD86, CD19, CD25, CD1b, CD20, CD66b, CD37, CD70, CD85k, CD89, CD57, CD69, CD71, CD79b…
TCD8EM	CD16, CD41, CD35, CD42a, CD9, CD30, CD62P, CD66c, CD10, CD32, CD66a_c_d_e, CD24, CD42b, CD61, CD88, CD23, CD34, CD62E, CD1d, CD79a, CD68, CD39, CD90, CD64, CD91, FMO, CD49b, CD21, CD93, CD72, CD4_MEM-241, CD13, CD40, CD1a, CD20, CD33, CD11c, CD1b, CD85d, CD19, CD49a, CD80, CD25, CD51, CD22, CD57, CD66b, CD56_LT56, CD51_61, CD62L, CD89, CD73, CD4_RPA-T4, CD69, CD15, CD85k, CD71, CD86, CD74, CD27, …
TCD8TEMRA	CD41, CD42a, CD9, CD49b, CD10, CD35, CD62P, CD66c, CD24, CD32, CD66a_c_d_e, CD42b, CD23, CD61, CD88, CD30, CD68, CD49a, CD39, CD1d, CD90, CD20, CD62E, CD91, CD13, CD79a, CD72, CD64, CD25, CD1a, CD33, CD19, CD34, CD21, CD51_61, CD93, CD40, CD11c, CD89, CD26, CD27, CD80, FMO, CD22, CD51, CD85d, CD86, CD73, CD66b, CD4_RPA-T4, CD1b, CD71, CD4_MEM-241, CD29, CD87, CD49c, CD69, CD85k, CD70, CD28, CD74,…
TCD8RAdim	CD41, CD16, CD42a, CD9, CD49b, CD66c, CD35, CD62P, CD10, CD24, CD66a_c_d_e, CD42b, CD30, CD61, CD88, CD23, CD39, CD1d, CD32, CD91, CD79a, CD1a, FMO, CD68, CD72, CD13, CD29, CD62E, CD33, CD49a, CD90, CD21, CD64, CD34, CD11c, CD11b, CD51, CD40, CD19, CD20, CD22, CD57, CD66b, CD70, CD1b, CD89, CD56_LT56, CD25, CD93, CD51_61, CD80, CD4_MEM-241, CD71, CD86, CD85d, CD85k, CD4_RPA-T4, CD37, CD85j, CD15,…
B	CD16, CD41, CD29, CD42a, CD49f, CD13, CD62P, CD9, CD69, CD49a, CD66c, CD30, CD66a_c_d_e, CD42b, CD45RO, CD26, CD43, CD57, CD91, CD61, CD88, CD11c, CD7, CD49b, CD33, CD56_LT56, CD68, CD93, CD64, CD79a, CD3_UCHT1, CD51, CD89, CD49c, CD87, CD1a, CD62E, CD85d, FMO, CD28, CD10, CD90, CD51_61, CD1b, CD34, CD2, CD80, CD70, CD85k, CD27, CD4_RPA-T4, CD49e, CD25, CD86, CD66b, CD95, CD97, CD4_MEM-241, CD83,…
Bnaive	CD16, CD41, CD29, CD42a, CD49f, CD49b, CD26, CD13, CD30, CD62P, CD9, CD42b, CD69, CD49a, CD49c, CD66c, CD27, CD45RO, CD64, CD66a_c_d_e, CD57, CD93, CD3_UCHT1, CD43, CD91, CD61, CD11c, CD28, CD7, CD33, CD68, CD88, CD56_LT56, CD85d, CD79a, CD95, CD89, CD1a, CD25, CD4_RPA-T4, CD51, CD62E, CD90, CD85k, CD80, CD11b, CD87, CD34, CD2, CD51_61, CD70, CD8_HIT8a, FMO, CD1b, CD10, CD4_MEM-241, CD86, CD96, C…
BnatEff	CD41, CD16, CD29, CD42a, CD49f, CD9, CD62P, CD42b, CD49a, CD43, CD45RO, CD61, CD10, CD57, CD91, CD13, CD49b, CD69, CD88, CD56_LT56, CD30, CD33, CD68, CD3_UCHT1, CD79a, CD26, CD93, CD64, CD51, CD34, CD1a, CD90, CD62E, CD66b, CD51_61, CD7, CD89, CD23, CD85d, CD1b, FMO, CD28, CD49c, CD66c, CD80, CD85k, CD49e, CD86, CD2, CD36, CD15, CD96, CD4_RPA-T4, CD11c, CD95, CD87, CD11b, CD4_MEM-241, CD97, CD83,…
BIgM	CD16, CD41, CD42a, CD9, CD29, CD49f, CD62P, CD42b, CD43, CD10, CD61, CD13, CD57, CD49b, CD88, CD49a, CD91, CD69, CD45RO, CD30, CD26, CD64, CD51, CD33, CD7, CD89, FMO, CD79a, CD62E, CD56_LT56, CD68, CD66b, CD66c, CD3_UCHT1, CD93, CD34, CD51_61, CD1a, CD83, CD23, CD28, CD84, CD15, CD49e, CD90, CD85d, CD87, CD1b, CD36, CD11c, CD85k, CD2, CD4_MEM-241, CD86, CD80, CD59, CD4_RPA-T4, CD49c, CD97, CD3_HI…
BswMem	CD16, CD41, CD42a, CD9, CD49f, CD66c, CD42b, CD43, CD61, CD88, CD62P, CD29, CD10, CD45RO, CD49b, CD13, CD69, CD57, CD49a, CD91, CD26, CD33, CD30, CD68, CD62E, CD7, CD64, CD51, CD34, CD56_LT56, CD89, CD79a, CD51_61, CD1a, CD66b, CD3_UCHT1, CD90, CD93, FMO, CD1b, CD23, CD28, CD49e, CD85d, CD2, CD87, CD36, CD83, CD84, CD85k, CD66a_c_d_e, CD86, CD80, CD15, CD4_MEM-241, CD97, CD3_HIT3a, CD5, CD96, CD6…
Bdn	CD41, CD16, CD42a, CD49b, CD9, CD29, CD49f, CD66c, CD42b, CD61, CD88, CD62P, CD45RO, CD13, CD49a, CD91, CD89, CD26, CD69, CD10, CD30, FMO, CD51, CD33, CD64, CD62E, CD28, CD66b, CD34, CD57, CD93, CD51_61, CD66a_c_d_e, CD49e, CD90, CD68, CD1a, CD43, CD3_UCHT1, CD79a, CD85d, CD56_LT56, CD2, CD87, CD27, CD4_MEM-241, CD49c, CD4_RPA-T4, CD85k, CD83, CD59, CD36, CD95, CD6, CD86, CD3_HIT3a, CD80, CD1b, C…
B27high	CD41, CD16, CD42a, CD9, CD49f, CD42b, CD61, CD62P, CD29, CD88, CD49b, CD13, CD69, CD57, CD91, CD49a, CD45RO, CD10, CD7, CD33, CD79a, CD34, CD66a_c_d_e, CD3_UCHT1, CD66b, CD26, CD30, CD68, CD66c, CD62E, CD51, CD64, CD56_LT56, FMO, CD1a, CD93, CD90, CD23, CD51_61, CD89, CD36, CD25, CD84, CD83, CD85d, CD28, CD49e, CD87, CD1b, CD85k, CD4_RPA-T4, CD4_MEM-241, CD96, CD6, CD2, CD5, CD72, CD80, CD15, CD1…
BnaiveTo	FMO, CD16, CD49b, CD49f, CD95, CD41, CD42a, CD13, CD30, CD26, CD29, CD49c, CD49a, CD66c, CD64, CD10, CD2, CD62E, CD1a, CD51, CD62L, CD45RO, CD11b, CD66a_c_d_e, CD8_MEM-31, CD89, CD14, CD57, CD7, CD49e, CD93, CD3_UCHT1, CD70, CD27, CD34, CD9, CD11c, CD62P, CD51_61, CD90, CD80, CD42b, CD91, CD79a, CD97, CD25, CD86, CD28, CD83, CD85k, CD33, CD71, CD56_LT56, CD4_MEM-241, CD68, CD87, CD5, CD1d, CD1b, …
CC	CD16, CD49f, CD49b, CD42a, CD49a, CD26, CD30, CD29, CD41, FMO, CD13, CD62E, CD66c, CD11b, CD49c, CD62L, CD7, CD64, CD45RO, CD1a, CD57, CD2, CD14, CD66a_c_d_e, CD8_MEM-31, CD62P, CD1d, CD5, CD11c, CD49e, CD89, CD90, CD6, CD51, CD42b, CD31, CD39, CD70, CD33, CD34, CD73, CD25, CD56_LT56, CD79a, CD93, CD23, CD68, CD28, CD69, CD3_UCHT1, CD85k, CD96, CD97, CD8_HIT8a, CD85d, CD1b, CD91, CD51_61, CD80, C…
CB	CD49f, CD16, CD49b, CD42a, CD41, CD26, CD49a, CD29, CD30, CD13, CD66c, CD11b, CD62E, CD49c, CD45RO, CD64, CD1a, CD62L, CD24, FMO, CD14, CD66a_c_d_e, CD51, CD7, CD39, CD1d, CD34, CD23, CD57, CD8_MEM-31, CD49e, CD5, CD89, CD62P, CD2, CD90, CD6, CD11c, CD70, CD31, CD42b, CD56_LT56, CD79a, CD69, CD33, CD25, CD91, CD97, CD93, CD49d, CD96, CD3_UCHT1, CD68, CD73, CD85k, CD28, CD8_HIT8a, CD83, CD1b, CD51…
UnswtMem	CD16, CD49b, FMO, CD49f, CD42a, CD95, CD29, CD49a, CD30, CD66c, CD10, CD45RO, CD13, CD62E, CD41, CD49c, CD57, CD62L, CD64, CD34, CD1a, CD93, CD14, CD26, CD2, CD9, CD66a_c_d_e, CD62P, CD7, CD49e, CD11b, CD89, CD28, CD11c, CD5, CD42b, CD8_MEM-31, CD33, CD80, CD1d, CD68, CD70, CD56_LT56, CD79a, CD86, CD51, CD85k, CD51_61, CD90, CD87, CD3_HIT3a, CD3_UCHT1, CD91, CD73, CD83, CD88, CD96, CD8_HIT8a, CD4…
SwtMem	CD16, CD49b, CD49f, CD42a, CD13, CD26, CD49a, CD30, CD29, CD41, CD66c, CD10, CD45RO, CD62E, FMO, CD64, CD14, CD57, CD1a, CD95, CD7, CD66a_c_d_e, CD49c, CD5, CD9, CD2, CD62P, CD93, CD34, CD89, CD23, CD49e, CD51, CD62L, CD1d, CD8_MEM-31, CD42b, CD6, CD79a, CD91, CD33, CD3_UCHT1, CD85k, CD83, CD28, CD80, CD90, CD56_LT56, CD25, CD87, CD68, CD51_61, CD70, CD11c, CD4_MEM-241, CD31, CD8_HIT8a, CD88, CD9…
PC	CD16, CD49b, CD42a, CD41, CD49a, FMO, CD30, CD26, CD29, CD13, CD11b, CD66c, CD64, CD62E, CD1a, CD34, CD62L, CD49c, CD66a_c_d_e, CD23, CD24, CD7, CD1d, CD62P, CD89, CD14, CD51, CD49e, CD42b, CD93, CD11c, CD49f, CD70, CD8_MEM-31, CD90, CD56_LT56, CD45RO, CD68, CD33, CD79a, CD69, CD80, CD5, CD83, CD85k, CD57, CD73, CD25, CD91, CD1b, CD51_61, CD8_HIT8a, CD96, CD85d, CD86, CD88, CD87, CD49d, CD4_MEM-2…
CD138negPC	CD16, CD49b, CD42a, CD41, CD49a, FMO, CD30, CD26, CD13, CD29, CD11b, CD66c, CD64, CD1a, CD62E, CD49c, CD34, CD62L, CD66a_c_d_e, CD24, CD23, CD49f, CD42b, CD7, CD62P, CD1d, CD14, CD8_MEM-31, CD89, CD51, CD11c, CD90, CD45RO, CD93, CD49e, CD70, CD56_LT56, CD91, CD33, CD79a, CD68, CD69, CD5, CD80, CD83, CD57, CD25, CD73, CD85k, CD8_HIT8a, CD96, CD1b, CD51_61, CD85d, CD86, CD88, CD87, CD49d, CD6, CD4_…
CD138posPC	CD16, CD49b, CD41, CD42a, CD49a, FMO, CD29, CD30, CD11b, CD26, CD13, CD66c, CD1a, CD64, CD34, CD62E, CD49c, CD66a_c_d_e, CD23, CD7, CD1d, CD51, CD62P, CD62L, CD24, CD49e, CD11c, CD45RO, CD89, CD42b, CD70, CD14, CD79a, CD56_LT56, CD33, CD68, CD80, CD8_MEM-31, CD69, CD90, CD57, CD85k, CD49f, CD73, CD1b, CD83, CD25, CD93, CD49d, CD8_HIT8a, CD51_61, CD91, CD85d, CD96, CD5, CD88, CD87, CD86, CD61, CD3…
DN34p	CD66c, FMO, CD23, CD68, CD24, CD91, CD56_LT56, CD16, CD72, CD85d, CD79a, CD39, CD70, CD25, CD14, CD85j, CD61, CD42a, CD29, CD45RO, CD79b, CD20, CD51, CD62P, CD64, CD41, CD42b, CD11c, CD11b, CD19, CD80, CD62E, CD51_61, CD86, CD89, CD66a_c_d_e, CD73, CD85k, CD40, CD22, CD30, CD4_RPA-T4, CD83, CD74, CD3_HIT3a, CD35, CD3_UCHT1, CD32, CD87, CD54, CD33, CD9, CD49c, CD90, CD27, CD57, CD1a, CD8_MEM-31, C…
DN34m1ap	CD66c, CD39, FMO, CD85k, CD70, CD56_LT56, CD79a, CD16, CD72, CD91, CD41, CD25, CD23, CD24, CD29, CD42a, CD14, CD85j, CD89, CD11b, CD62P, CD64, CD20, CD51, CD66a_c_d_e, CD11c, CD68, CD42b, CD86, CD30, CD85d, CD19, CD61, CD80, CD79b, CD73, CD32, CD74, CD40, CD51_61, CD62E, CD3_HIT3a, CD83, CD22, CD35, CD87, CD33, CD3_UCHT1, CD45RO, CD66b, CD90, CD27, CD54, CD100, CD57, CD49c, CD49a, CD9, CD13, CD8_…
CD4ISP	CD66c, CD14, CD39, CD42a, CD24, FMO, CD23, CD70, CD25, CD32, CD41, CD56_LT56, CD16, CD20, CD91, CD79a, CD11c, CD11b, CD30, CD62P, CD68, CD72, CD66a_c_d_e, CD64, CD85j, CD86, CD42b, CD51, CD85d, CD79b, CD35, CD89, CD29, CD87, CD40, CD80, CD61, CD19, CD62E, CD33, CD73, CD85k, CD57, CD22, CD74, CD83, CD51_61, CD13, CD27, CD49a, CD3_HIT3a, CD49c, CD66b, CD100, CD3_UCHT1, CD49b, CD54, CD90, CD93, CD15…
DP3m	CD16, CD41, CD64, CD30, CD42a, CD66c, CD85j, CD24, CD11b, CD49a, CD14, CD39, CD13, CD27, CD23, CD66a_c_d_e, CD32, CD51, CD62P, FMO, CD89, CD73, CD57, CD72, CD79b, CD42b, CD34, CD25, CD70, CD91, CD56_LT56, CD20, CD80, CD62E, CD85d, CD79a, CD33, CD68, CD11c, CD49b, CD35, CD86, CD85k, CD61, CD74, CD83, CD51_61, CD40, CD49c, CD29, CD22, CD87, CD19, CD54, CD63, CD93, CD66b, CD37, CD45RA, CD15, CD26, C…
DP3p	CD16, CD41, CD64, CD85j, CD13, CD30, CD42a, CD66c, CD49a, CD24, CD11b, CD89, CD14, CD39, CD73, CD51, CD23, CD32, CD66a_c_d_e, CD62P, CD80, FMO, CD57, CD79b, CD62E, CD72, CD49b, CD42b, CD70, CD25, CD91, CD56_LT56, CD20, CD86, CD85d, CD79a, CD11c, CD33, CD68, CD85k, CD34, CD35, CD83, CD51_61, CD74, CD61, CD27, CD87, CD29, CD49c, CD40, CD22, CD19, CD63, CD54, CD93, CD66b, CD37, CD45RA, CD15, CD26, C…
CD4SP1ap	CD35, CD24, CD39, CD14, CD41, CD29, CD42a, FMO, CD23, CD32, CD85j, CD16, CD66c, CD11b, CD70, CD91, CD56_LT56, CD79a, CD68, CD20, CD30, CD49b, CD13, CD57, CD64, CD61, CD33, CD51, CD89, CD72, CD62P, CD11c, CD42b, CD80, CD62E, CD34, CD79b, CD19, CD25, CD73, CD40, CD85d, CD22, CD85k, CD51_61, CD10, CD87, CD83, CD21, CD49a, CD86, CD74, CD54, CD63, CD66b, CD49c, CD66a_c_d_e, CD95, CD93, CD26, CD88, CD1…
CD4SP1am	CD16, CD85j, CD41, CD64, CD35, CD51, CD29, CD10, CD32, CD89, CD24, CD1a, CD74, CD62P, CD80, CD34, CD86, FMO, CD8_MEM-31, CD42a, CD72, CD79b, CD85k, CD70, CD56_LT56, CD79a, CD85d, CD33, CD51_61, CD54, CD39, CD68, CD91, CD1b, CD14, CD23, CD11b, CD30, CD13, CD66c, CD61, CD8_HIT8a, CD20, CD42b, CD83, CD49b, CD62E, CD1d, CD57, CD11c, CD19, CD63, CD73, CD22, CD87, CD40, CD21, CD93, CD66b, CD95, CD25, C…
CD8SP1ap	CD16, CD85j, CD35, CD29, CD30, CD24, CD32, CD39, CD62P, FMO, CD41, CD11b, CD14, CD70, CD66a_c_d_e, CD56_LT56, CD79a, CD85d, CD33, CD68, CD62E, CD23, CD13, CD80, CD66c, CD91, CD34, CD20, CD51, CD42a, CD61, CD64, CD72, CD42b, CD57, CD89, CD22, CD19, CD11c, CD49b, CD79b, CD10, CD51_61, CD85k, CD25, CD83, CD49a, CD87, CD86, CD40, CD74, CD49c, CD93, CD66b, CD21, CD95, CD73, CD63, CD1d, CD88, CD71, CD3…
CD8SP1am	CD85j, CD16, CD35, CD29, CD51, CD10, CD32, CD24, FMO, CD42a, CD70, CD91, CD56_LT56, CD39, CD79a, CD33, CD30, CD41, CD23, CD14, CD66c, CD20, CD11b, CD61, CD13, CD62P, CD68, CD42b, CD34, CD89, CD64, CD49b, CD66a_c_d_e, CD57, CD1d, CD19, CD51_61, CD85d, CD80, CD11c, CD72, CD85k, CD79b, CD22, CD86, CD83, CD87, CD62E, CD40, CD25, CD74, CD93, CD66b, CD49c, CD95, CD4_MEM-241, CD4_RPA-T4, CD49a, CD1a, CD…
