# Supplementary material for: CD Maps—Dynamic Profiling of CD1–CD100 Surface Expression on Human Leukocyte and Lymphocyte Subsets
Source: Front Immunol. 2019 Oct 23;10:2434. doi: 10.3389/fimmu.2019.02434 (PMC6820661; doi:10.3389/fimmu.2019.02434)
Supplement: Supplementary file 15 [file Table_6.xlsx]

## Sheet: Sheet1
Supplementary Table 6. Table listing order of CD markers per population in same order as in Supplementary figure 7, rising Frequency of positive cells. Markers in bold are markers highlighted in orange in Supplementary figure 7.
CD markers
Neutro	CD40, CD49a, CD68, CD70, CD91, FMO, CD79a, CD19, CD22, CD23, CD25, CD49c, CD90, CD26, CD30, CD56_LT56, CD20, CD21, CD1d, CD27, CD48, CD72, CD5, CD1a, CD7, CD45RA, CD28, CD3_HIT3a, CD14, CD2, CD57, CD29, CD6, CD69, CD8_HIT8a, CD71, CD86, CD36, CD4_MEM-241, CD51, CD8_MEM-31, CD73, CD42b, CD80, CD52, CD79b, CD85k, CD3_UCHT1, CD1b, CD42a, CD62E, CD62P, CD9, CD34, CD49b, CD96, CD49d, CD84, CD85j, CD51…
Eosin	CD68, CD79a, CD91, FMO, CD90, CD1a, CD23, CD56_LT56, CD70, CD14, CD1d, CD30, CD40, CD19, CD21, CD22, CD25, CD49a, CD72, CD10, CD49c, CD20, CD86, CD48, CD57, CD79b, CD8_HIT8a, CD85d, CD85k, CD1b, CD28, CD80, CD26, CD27, CD29, CD62P, CD54, CD73, CD45RA, CD6, CD36, CD62E, CD7, CD42a, CD8_MEM-31, CD15, CD34, CD5, CD2, CD3_HIT3a, CD42b, CD85j, CD4_MEM-241, CD96, CD93, CD3_UCHT1, CD69, CD74, CD51, CD51…
Baso	CD1d, CD22, CD40, CD68, CD70, CD79a, FMO, CD30, CD90, CD91, CD19, CD56_LT56, CD14, CD21, CD27, CD49a, CD72, CD20, CD23, CD39, CD49c, CD7, CD15, CD1a, CD28, CD29, CD5, CD10, CD3_HIT3a, CD79b, CD6, CD4_MEM-241, CD85k, CD57, CD64, CD80, CD1b, CD73, CD86, CD96, CD62P, CD8_HIT8a, CD62E, CD85d, CD85j, CD93, CD42a, CD36, CD66c, CD51, CD66b, CD42b, CD16, CD45RA, CD49f, CD8_MEM-31, CD51_61, CD74, CD24, CD…
classMono	CD25, CD68, FMO, CD22, CD79a, CD40, CD70, CD21, CD19, CD30, CD7, CD27, CD49c, CD20, CD5, CD72, CD57, CD90, CD15, CD23, CD1a, CD26, CD73, CD80, CD28, CD10, CD66b, CD8_HIT8a, CD66a_c_d_e, CD6, CD79b, CD96, CD49a, CD69, CD42b, CD29, CD42a, CD66c, CD3_UCHT1, CD56_LT56, CD1b, CD62E, CD34, CD83, CD24, CD8_MEM-31, CD51_61, CD16, CD49f, CD3_HIT3a, CD45RA, CD62P, CD37, CD62L, CD2, CD49b, CD41, CD9, CD51, …
interMono	CD68, CD79a, FMO, CD90, CD49c, CD70, CD25, CD19, CD22, CD26, CD30, CD7, CD20, CD21, CD27, CD1a, CD5, CD23, CD49a, CD57, CD72, CD69, CD56_LT56, CD73, CD6, CD96, CD29, CD80, CD8_HIT8a, CD79b, CD8_MEM-31, CD66b, CD1b, CD3_UCHT1, CD42b, CD40, CD62E, CD15, CD62P, CD34, CD3_HIT3a, CD66c, CD42a, CD51_61, CD10, CD28, CD83, CD2, CD51, CD66a_c_d_e, CD49f, CD49b, CD41, CD62L, CD61, CD24, CD59, CD9, CD91, CD…
noncMono	CD23, CD68, CD70, CD79a, CD90, FMO, CD49a, CD21, CD22, CD25, CD30, CD27, CD1a, CD62P, CD19, CD51, CD20, CD49c, CD72, CD29, CD69, CD7, CD28, CD56_LT56, CD5, CD57, CD26, CD73, CD8_HIT8a, CD80, CD8_MEM-31, CD96, CD10, CD6, CD1b, CD3_UCHT1, CD79b, CD15, CD40, CD62E, CD2, CD66b, CD42b, CD49b, CD14, CD42a, CD51_61, CD34, CD36, CD9, CD66c, CD59, CD39, CD49f, CD24, CD1d, CD61, CD41, CD45RO, CD83, CD62L, …
NK	CD68, CD79a, FMO, CD90, CD19, CD20, CD22, CD23, CD30, CD1a, CD21, CD40, CD70, CD91, CD1d, CD14, CD49c, CD25, CD72, CD39, CD5, CD62P, CD10, CD51, CD73, CD80, CD28, CD79b, CD15, CD3_HIT3a, CD1b, CD42b, CD66b, CD36, CD66a_c_d_e, CD42a, CD29, CD49a, CD27, CD9, CD71, CD85d, CD34, CD64, CD62E, CD86, CD26, CD35, CD93, CD33, CD85k, CD49b, CD66c, CD69, CD4_MEM-241, CD45RO, CD51_61, CD24, CD41, CD61, CD89,…
mDC	CD68, CD30, CD49a, CD79a, CD90, FMO, CD70, CD23, CD15, CD1a, CD49c, CD29, CD40, CD57, CD80, CD27, CD25, CD7, CD10, CD20, CD66c, CD96, CD21, CD62E, CD66a_c_d_e, CD8_HIT8a, CD42b, CD79b, CD62P, CD8_MEM-31, CD66b, CD56_LT56, CD69, CD51, CD73, CD1b, CD91, CD28, CD42a, CD24, CD51_61, CD83, CD22, CD89, CD49b, CD14, CD61, CD19, CD41, CD85d, CD93, CD72, CD3_UCHT1, CD49f, CD9, CD37, CD36, CD6, CD74, CD35,…
pDC	CD1d, CD25, CD27, CD30, CD49a, CD68, CD70, CD79a, CD90, CD91, FMO, CD14, CD23, CD21, CD1a, CD57, CD19, CD49c, CD39, CD40, CD56_LT56, CD8_HIT8a, CD96, CD29, CD6, CD22, CD20, CD69, CD1b, CD45RO, CD15, CD42b, CD80, CD51, CD66a_c_d_e, CD62P, CD93, CD24, CD3_UCHT1, CD35, CD64, CD66b, CD66c, CD11c, CD79b, CD62E, CD72, CD73, CD8_MEM-31, CD49f, CD42a, CD95, CD89, CD83, CD28, CD49b, CD51_61, CD11b, CD5, C…
Lymphs	CD68, CD79a, FMO, CD1a, CD1b, CD90, CD62E, CD51_61, CD80, CD49a, CD30, CD70, CD91, CD34, CD69, CD10, CD23, CD51, CD96, CD25, CD49c, CD15, CD39, CD29, CD71, CD62P, CD66a_c_d_e, CD42b, CD1d, CD85d, CD56_LT56, CD85k, CD66b, CD93, CD64, CD83, CD40, CD74, CD86, CD33, CD49b, CD22, CD42a, CD66c, CD87, CD72, CD21, CD11c, CD89, CD19, CD13, CD20, CD57, CD61, CD79b, CD37, CD24, CD41, CD54, CD36, CD73, CD85j…
T	CD40, CD68, CD19, CD79a, CD22, FMO, CD1d, CD21, CD23, CD51, CD72, CD1a, CD91, CD85d, CD1b, CD51_61, CD62E, CD33, CD80, CD10, CD90, CD85k, CD86, CD30, CD70, CD71, CD11c, CD64, CD93, CD39, CD20, CD34, CD49a, CD56_LT56, CD74, CD69, CD96, CD62P, CD15, CD79b, CD24, CD42b, CD36, CD37, CD25, CD32, CD49c, CD66a_c_d_e, CD66b, CD83, CD89, CD13, CD87, CD61, CD29, CD41, CD42a, CD35, CD85j, CD54, CD97, CD49b,…
Tgd	CD68, CD79a, CD33, CD90, CD85d, CD1a, CD91, CD25, CD23, CD1b, CD85k, CD49a, CD39, CD70, CD30, CD51_61, FMO, CD86, CD19, CD1d, CD51, CD29, CD62E, CD80, CD22, CD93, CD40, CD71, CD64, CD34, CD74, CD62P, CD21, CD10, CD15, CD83, CD49c, CD96, CD56_LT56, CD72, CD42b, CD11c, CD66a_c_d_e, CD87, CD20, CD36, CD89, CD79b, CD66b, CD32, CD4_RPA-T4, CD61, CD42a, CD13, CD41, CD35, CD69, CD24, CD73, CD66c, CD37, …
TCD4	CD40, CD68, CD19, CD79a, CD22, CD21, FMO, CD1d, CD72, CD23, CD51, CD1a, CD56_LT56, CD91, CD85d, CD1b, CD51_61, CD62E, CD10, CD33, CD86, CD69, CD85k, CD80, CD20, CD11c, CD30, CD90, CD93, CD70, CD49a, CD64, CD71, CD34, CD39, CD96, CD85j, CD74, CD62P, CD15, CD79b, CD42b, CD24, CD36, CD37, CD32, CD49c, CD66a_c_d_e, CD66b, CD89, CD8_HIT8a, CD83, CD57, CD54, CD61, CD25, CD13, CD73, CD87, CD35, CD41, CD…
TCD4naive	CD68, CD40, CD19, CD79a, CD70, CD90, CD21, CD72, CD1d, CD22, FMO, CD1a, CD51, CD23, CD56_LT56, CD49a, CD71, CD91, CD33, CD85d, CD86, CD1b, CD62E, CD51_61, CD39, CD69, CD80, CD10, CD85k, CD11c, CD30, CD93, CD96, CD20, CD64, CD34, CD73, CD74, CD85j, CD29, CD54, CD79b, CD25, CD62P, CD15, CD24, CD42b, CD75, CD83, CD49c, CD57, CD36, CD8_HIT8a, CD32, CD89, CD37, CD66b, CD66a_c_d_e, CD35, CD87, CD45RO, …
TCD4CM	CD40, CD19, CD68, CD79a, CD1d, FMO, CD21, CD22, CD51, CD72, CD23, CD56_LT56, CD91, CD1a, CD33, CD85d, CD20, CD85k, CD1b, CD11c, CD62E, CD10, CD51_61, CD86, CD45RA, CD80, CD30, CD69, CD93, CD37, CD90, CD64, CD34, CD85j, CD49a, CD74, CD15, CD62P, CD70, CD71, CD96, CD32, CD79b, CD8_HIT8a, CD36, CD42b, CD24, CD8_MEM-31, CD66a_c_d_e, CD54, CD39, CD66b, CD89, CD49c, CD13, CD41, CD61, CD83, CD87, CD35, …
TCD4EM	FMO, CD79a, CD22, CD72, CD1d, CD91, CD1a, CD21, CD51, CD23, CD56_LT56, CD85d, CD62E, CD10, CD34, CD1b, CD33, CD85k, CD93, CD19, CD27, CD40, CD68, CD11c, CD51_61, CD45RA, CD69, CD20, CD80, CD64, CD30, CD86, CD37, CD62P, CD49a, CD15, CD39, CD85j, CD71, CD42b, CD74, CD70, CD36, CD24, CD32, CD90, CD66a_c_d_e, CD8_MEM-31, CD66b, CD25, CD96, CD38, CD61, CD41, CD49c, CD13, CD87, CD42a, CD79b, CD89, CD8_…
TCD4TEMRA	CD51_61, CD19, CD1a, CD1b, CD21, CD22, CD23, CD27, CD40, CD68, CD72, CD79a, CD91, FMO, CD80, CD51, CD20, CD25, CD10, CD56_LT56, CD69, CD62E, CD49a, CD15, CD93, CD24, CD90, CD83, CD39, CD1d, CD85d, CD74, CD30, CD49c, CD64, CD66a_c_d_e, CD70, CD86, CD34, CD33, CD62P, CD32, CD85k, CD71, CD35, CD42b, CD66b, CD79b, CD41, CD42a, CD89, CD36, CD61, CD85j, CD96, CD73, CD29, CD66c, CD11c, CD9, CD87, CD8_HI…
TCD8	CD40, CD68, CD19, CD22, CD79a, CD1d, FMO, CD72, CD51, CD21, CD91, CD1a, CD23, CD33, CD90, CD25, CD85d, CD1b, CD85k, CD51_61, CD80, CD10, CD86, CD62E, CD4_RPA-T4, CD71, CD39, CD70, CD30, CD64, CD93, CD34, CD4_MEM-241, CD11c, CD74, CD62P, CD49a, CD20, CD15, CD24, CD79b, CD29, CD42b, CD96, CD36, CD66a_c_d_e, CD37, CD32, CD49c, CD13, CD69, CD87, CD66b, CD56_LT56, CD89, CD83, CD61, CD42a, CD41, CD35, …
TCD8naive	CD40, CD68, CD19, CD90, CD70, CD79a, CD1d, CD22, CD25, CD72, CD51, CD91, CD1a, CD71, FMO, CD21, CD23, CD33, CD85d, CD1b, CD39, CD86, CD51_61, CD10, CD49a, CD80, CD56_LT56, CD62E, CD85k, CD4_RPA-T4, CD30, CD64, CD4_MEM-241, CD11c, CD69, CD93, CD29, CD34, CD74, CD96, CD62P, CD79b, CD20, CD45RO, CD24, CD15, CD49c, CD85j, CD37, CD42b, CD36, CD32, CD13, CD87, CD66a_c_d_e, CD89, CD66b, CD35, CD61, CD83…
TCD8CM	CD79a, CD72, FMO, CD22, CD23, CD21, CD33, CD1a, CD90, CD80, CD91, CD85d, CD85k, CD1d, CD1b, CD64, CD11c, CD4_RPA-T4, CD10, CD25, CD34, CD62E, CD30, CD19, CD4_MEM-241, CD40, CD51, CD68, CD93, CD71, CD51_61, CD86, CD37, CD70, CD56_LT56, CD15, CD79b, CD74, CD39, CD62P, CD32, CD42b, CD96, CD20, CD45RA, CD87, CD24, CD36, CD49a, CD66a_c_d_e, CD69, CD13, CD66b, CD29, CD85j, CD49c, CD35, CD89, CD83, CD61…
TCD8EM	CD72, CD33, CD93, CD22, FMO, CD85d, CD4_RPA-T4, CD85k, CD64, CD23, CD91, CD71, CD34, CD90, CD62E, CD10, CD19, CD1a, CD1b, CD1d, CD20, CD21, CD27, CD30, CD4_MEM-241, CD40, CD51, CD51_61, CD68, CD79a, CD80, CD86, CD11c, CD39, CD25, CD15, CD62P, CD74, CD79b, CD42b, CD37, CD87, CD66a_c_d_e, CD24, CD83, CD13, CD36, CD96, CD69, CD49c, CD32, CD66b, CD42a, CD35, CD89, CD70, CD29, CD73, CD61, CD41, CD49a,…
TCD8TEMRA	CD19, CD79a, CD72, CD21, CD80, CD33, CD90, CD20, CD22, CD10, CD51_61, CD85d, CD85k, CD1b, CD23, CD86, CD39, CD64, CD1a, CD30, CD4_RPA-T4, CD49a, CD34, FMO, CD71, CD25, CD91, CD62E, CD93, CD1d, CD27, CD4_MEM-241, CD40, CD51, CD68, CD62P, CD29, CD96, CD15, CD74, CD70, CD49c, CD79b, CD24, CD73, CD69, CD32, CD42b, CD36, CD83, CD13, CD87, CD11c, CD66b, CD66a_c_d_e, CD37, CD35, CD89, CD61, CD42a, CD41,…
TCD8RAdim	CD19, CD68, CD79a, CD40, CD21, CD22, CD1a, CD51, CD72, CD91, CD25, CD85d, CD85k, CD33, CD1d, CD86, CD90, CD23, FMO, CD10, CD1b, CD80, CD62E, CD71, CD4_RPA-T4, CD39, CD30, CD70, CD51_61, CD64, CD93, CD4_MEM-241, CD34, CD11c, CD20, CD74, CD62P, CD49a, CD15, CD79b, CD24, CD37, CD42b, CD66a_c_d_e, CD36, CD29, CD32, CD49c, CD87, CD69, CD66b, CD13, CD89, CD56_LT56, CD96, CD42a, CD61, CD41, CD83, CD85j,…
B	CD68, CD3_UCHT1, FMO, CD90, CD1a, CD49a, CD28, CD91, CD51, CD69, CD56_LT56, CD51_61, CD25, CD33, CD62E, CD79a, CD26, CD96, CD85k, CD1b, CD80, CD2, CD64, CD93, CD29, CD4_RPA-T4, CD4_MEM-241, CD85d, CD34, CD86, CD30, CD62P, CD45RO, CD15, CD7, CD1d, CD3_HIT3a, CD70, CD49f, CD13, CD36, CD97, CD66a_c_d_e, CD87, CD42b, CD66b, CD10, CD49c, CD89, CD11c, CD42a, CD57, CD8_HIT8a, CD61, CD49e, CD41, CD83, CD…
Bnaive	CD68, CD3_UCHT1, CD25, CD90, CD51, CD1a, CD56_LT56, CD69, CD49a, CD33, CD4_RPA-T4, CD28, CD80, CD91, CD2, CD51_61, CD85d, CD7, FMO, CD1b, CD4_MEM-241, CD96, CD85k, CD86, CD26, CD79a, CD64, CD70, CD29, CD62E, CD27, CD93, CD34, CD1d, CD30, CD45RO, CD62P, CD95, CD11c, CD15, CD3_HIT3a, CD97, CD42b, CD57, CD49c, CD8_HIT8a, CD71, CD13, CD49f, CD66a_c_d_e, CD36, CD87, CD66b, CD10, CD89, CD83, CD8_MEM-31…
BnatEff	CD68, CD3_UCHT1, CD90, CD69, CD85d, CD28, CD62E, CD79a, CD33, CD1b, CD49a, FMO, CD56_LT56, CD1a, CD91, CD85k, CD93, CD34, CD29, CD96, CD30, CD62P, CD15, CD86, CD51, CD4_MEM-241, CD7, CD80, CD26, CD2, CD64, CD45RO, CD25, CD51_61, CD10, CD23, CD49f, CD4_RPA-T4, CD49c, CD36, CD66b, CD87, CD42a, CD57, CD42b, CD49e, CD97, CD61, CD41, CD83, CD70, CD13, CD8_HIT8a, CD89, CD49b, CD71, CD3_HIT3a, CD11c, CD…
BIgM	CD33, CD68, CD90, CD28, CD85d, CD51_61, CD85k, CD64, CD96, CD56_LT56, CD93, CD62E, CD1a, CD1b, CD29, CD3_UCHT1, CD4_MEM-241, CD49a, CD51, CD69, CD79a, CD91, FMO, CD25, CD26, CD34, CD62P, CD30, CD2, CD80, CD10, CD4_RPA-T4, CD15, CD61, CD36, CD83, CD86, CD45RO, CD13, CD41, CD97, CD87, CD7, CD42b, CD23, CD49e, CD57, CD3_HIT3a, CD1d, CD8_HIT8a, CD42a, CD89, CD49f, CD5, CD66b, CD66a_c_d_e, CD84, CD88,…
BswMem	CD28, CD68, CD56_LT56, CD62E, CD90, CD33, CD85d, CD69, CD93, CD1a, CD79a, CD51, CD25, CD51_61, CD3_UCHT1, CD91, FMO, CD4_MEM-241, CD2, CD64, CD49a, CD96, CD85k, CD26, CD30, CD1b, CD15, CD45RO, CD34, CD29, CD49e, CD3_HIT3a, CD80, CD62P, CD36, CD4_RPA-T4, CD49f, CD13, CD1d, CD23, CD86, CD97, CD57, CD5, CD7, CD66a_c_d_e, CD87, CD89, CD10, CD42b, CD66b, CD61, CD83, CD42a, CD41, CD49b, CD66c, CD8_HIT8…
Bdn	CD3_UCHT1, CD33, CD64, CD69, CD49a, CD51_61, CD91, CD1a, CD1b, CD1d, CD26, CD27, CD28, CD4_MEM-241, CD51, CD56_LT56, CD68, CD79a, CD80, CD85d, CD85k, CD90, CD93, CD96, FMO, CD29, CD30, CD62E, CD4_RPA-T4, CD34, CD45RO, CD25, CD2, CD15, CD13, CD62P, CD87, CD89, CD66a_c_d_e, CD3_HIT3a, CD97, CD36, CD49f, CD66b, CD8_HIT8a, CD10, CD86, CD49c, CD7, CD6, CD70, CD42a, CD23, CD42b, CD83, CD5, CD66c, CD41,…
B27high	CD51_61, CD85d, CD62E, CD33, CD1a, CD28, CD49a, CD51, CD56_LT56, CD68, CD79a, CD90, CD91, CD93, FMO, CD64, CD1b, CD26, CD10, CD69, CD3_UCHT1, CD96, CD34, CD25, CD7, CD62P, CD15, CD49e, CD4_RPA-T4, CD4_MEM-241, CD45RO, CD85k, CD36, CD30, CD66b, CD87, CD29, CD61, CD2, CD42a, CD83, CD57, CD41, CD5, CD42b, CD80, CD89, CD23, CD13, CD6, CD49b, CD8_HIT8a, CD3_HIT3a, CD49f, CD66a_c_d_e, CD66c, CD88, CD9,…
BnaiveTo	CD49b, CD91, CD7, CD49c, CD56_LT56, CD1a, CD26, CD3_HIT3a, CD49a, CD36, CD25, CD42a, CD51_61, CD70, CD62E, CD30, CD8_HIT8a, CD85d, CD8_MEM-31, CD42b, CD33, CD29, CD96, CD64, CD28, CD66a_c_d_e, CD4_MEM-241, CD1d, CD2, CD10, CD66b, CD62P, CD68, CD51, CD85k, CD41, CD1b, CD89, CD88, CD66c, CD45RO, CD34, CD13, CD80, CD57, CD11b, CD61, CD49e, CD16, CD15, CD3_UCHT1, CD87, CD11c, CD79a, CD93, CD90, CD14,…
CC	CD1d, CD33, CD49c, CD56_LT56, CD36, CD8_MEM-31, CD29, CD42a, CD42b, CD66b, CD28, CD7, CD26, CD41, CD1a, CD30, CD68, CD61, CD3_HIT3a, CD85d, CD70, CD1b, CD66a_c_d_e, CD62P, CD62E, CD25, FMO, CD64, CD34, CD91, CD49a, CD49b, CD8_HIT8a, CD16, CD31, CD88, CD57, CD89, CD15, CD51, CD49f, CD4_MEM-241, CD6, CD11c, CD62L, CD5, CD49e, CD2, CD13, CD93, CD80, CD66c, CD49d, CD96, CD85k, CD97, CD51_61, CD3_UCHT…
CB	CD1d, CD49c, CD56_LT56, CD1a, CD7, CD33, CD61, CD66b, CD26, CD62E, CD70, CD42a, CD62P, CD66a_c_d_e, CD51, CD36, CD8_MEM-31, CD42b, CD25, CD29, CD8_HIT8a, CD96, CD89, CD91, CD34, CD41, CD1b, CD68, CD3_HIT3a, FMO, CD28, CD49e, CD66c, CD15, CD90, CD88, CD85d, CD64, CD11b, CD16, CD30, CD4_MEM-241, CD14, CD5, CD80, CD13, CD62L, CD31, CD87, CD6, CD49d, CD49f, CD57, CD11c, CD51_61, CD69, CD49a, CD49b, C…
UnswtMem	CD56_LT56, CD26, CD42a, CD7, CD66b, CD30, CD49c, FMO, CD29, CD33, CD10, CD42b, CD28, CD70, CD49b, CD62P, CD1d, CD91, CD1b, CD3_HIT3a, CD66a_c_d_e, CD25, CD8_HIT8a, CD1a, CD62E, CD36, CD68, CD2, CD45RO, CD88, CD61, CD87, CD57, CD34, CD85d, CD16, CD15, CD49a, CD51, CD66c, CD41, CD4_MEM-241, CD93, CD64, CD96, CD8_MEM-31, CD85k, CD13, CD49e, CD79a, CD80, CD14, CD90, CD5, CD49f, CD89, CD11b, CD86, CD9…
SwtMem	CD1a, CD49b, CD56_LT56, CD36, CD49c, CD1d, CD66b, CD42a, CD88, CD49a, CD29, CD7, CD66a_c_d_e, CD34, CD62E, CD91, CD26, CD42b, CD64, CD8_MEM-31, CD33, CD61, CD28, CD1b, CD30, CD8_HIT8a, CD10, CD3_HIT3a, CD41, CD66c, CD25, CD13, CD87, CD62P, CD80, CD85d, CD89, CD45RO, CD96, CD85k, CD5, CD15, CD2, CD4_MEM-241, CD93, CD70, CD49e, CD90, CD16, CD68, CD31, CD14, CD51, CD57, CD9, CD49f, CD79a, FMO, CD3_U…
PC	CD42a, CD1d, CD36, CD30, CD66b, CD68, CD33, CD1a, CD56_LT56, CD7, CD70, CD8_MEM-31, CD64, CD62E, CD49b, CD42b, CD49c, CD41, CD66c, CD62P, CD1b, CD8_HIT8a, CD29, CD66a_c_d_e, CD34, CD16, CD26, CD15, CD49a, CD61, CD85d, FMO, CD88, CD11b, CD85k, CD3_HIT3a, CD11c, CD13, CD93, CD51, CD91, CD87, CD96, CD80, CD62L, CD5, CD4_MEM-241, CD90, CD69, CD25, CD49e, CD14, CD89, CD23, CD73, CD51_61, CD86, CD79a, …
CD138negPC	CD1a, CD36, CD33, CD1d, CD64, CD26, CD49c, CD70, CD42a, CD62E, CD8_HIT8a, CD66c, CD29, CD41, CD11b, CD3_HIT3a, CD7, CD66a_c_d_e, CD49b, CD8_MEM-31, CD91, CD34, CD68, CD13, CD15, CD49a, CD56_LT56, CD62P, CD66b, CD88, FMO, CD11c, CD42b, CD30, CD51_61, CD85k, CD16, CD51, CD61, CD62L, CD4_MEM-241, CD89, CD5, CD90, CD14, CD96, CD87, CD85d, CD80, CD25, CD69, CD1b, CD23, CD73, CD83, CD24, CD93, CD57, CD…
CD138posPC	CD36, CD42a, CD1d, CD33, CD70, CD49b, CD1a, CD62E, CD68, CD64, CD3_HIT3a, CD62P, CD1b, CD30, CD8_MEM-31, CD66b, CD49c, CD56_LT56, CD16, CD66c, CD41, CD26, CD49a, CD7, CD8_HIT8a, CD85d, FMO, CD66a_c_d_e, CD29, CD61, CD85k, CD15, CD34, CD42b, CD11b, CD51, CD80, CD4_MEM-241, CD11c, CD89, CD90, CD13, CD88, CD96, CD5, CD91, CD25, CD79a, CD86, CD49e, CD69, CD93, CD51_61, CD14, CD87, CD57, CD45RO, CD23,…
DN34p	CD91, CD29, CD66c, CD80, CD66a_c_d_e, CD70, CD20, CD19, CD22, CD42a, CD85j, CD25, CD40, CD51_61, CD62P, CD62E, CD14, CD79a, CD86, CD73, CD39, CD24, CD23, CD3_HIT3a, CD51, CD11c, CD16, CD42b, CD72, CD15, CD4_RPA-T4, CD49c, CD56_LT56, CD61, CD64, CD66b, CD68, CD8_HIT8a, CD8_MEM-31, CD85d, CD85k, CD89, FMO, CD36, CD37, CD35, CD41, CD32, CD30, CD90, CD79b, CD54, CD3_UCHT1, CD45RO, CD1d, CD74, CD33, C…
DN34m1ap	CD91, CD70, CD29, CD25, CD19, CD72, CD40, CD36, CD23, CD33, CD32, CD51_61, CD30, CD22, CD64, CD62E, CD79a, CD41, CD49c, CD14, CD66c, CD15, CD11b, CD86, CD42a, CD42b, CD11c, CD66a_c_d_e, CD20, CD39, CD79b, CD37, CD24, CD16, CD4_RPA-T4, CD51, CD56_LT56, CD61, CD62P, CD66b, CD68, CD73, CD8_HIT8a, CD8_MEM-31, CD80, CD85d, CD85j, CD85k, CD89, FMO, CD54, CD74, CD35, CD3_HIT3a, CD3_UCHT1, CD83, CD90, CD…
CD4ISP	CD19, CD40, CD68, CD23, CD70, CD20, CD51_61, CD15, CD85j, CD49a, CD66c, CD36, CD49c, CD14, CD32, CD91, CD66a_c_d_e, CD39, CD24, CD62E, CD42b, CD62P, CD42a, CD11b, CD51, CD30, CD33, CD11c, CD16, CD22, CD25, CD29, CD3_UCHT1, CD35, CD41, CD56_LT56, CD61, CD64, CD66b, CD72, CD73, CD79a, CD79b, CD80, CD85d, CD85k, CD86, CD89, FMO, CD74, CD13, CD54, CD49b, CD27, CD37, CD90, CD83, CD57, CD93, CD8_HIT8a,…
DP3m	CD85d, FMO, CD33, CD56_LT56, CD89, CD66b, CD79a, CD61, CD68, CD25, CD70, CD80, CD19, CD22, CD29, CD42a, CD91, CD85k, CD73, CD64, CD49a, CD23, CD66a_c_d_e, CD85j, CD72, CD20, CD36, CD15, CD14, CD66c, CD30, CD42b, CD40, CD32, CD51, CD49b, CD39, CD35, CD49c, CD41, CD62E, CD11c, CD37, CD24, CD51_61, CD11b, CD62P, CD16, CD79b, CD86, CD45RA, CD13, CD27, CD34, CD54, CD49e, CD74, CD57, CD93, CD83, CD63, …
DP3p	CD66b, FMO, CD33, CD85d, CD61, CD70, CD89, CD79a, CD56_LT56, CD22, CD19, CD29, CD80, CD42a, CD85k, CD66a_c_d_e, CD14, CD68, CD23, CD25, CD85j, CD91, CD64, CD72, CD20, CD36, CD73, CD66c, CD49a, CD42b, CD15, CD41, CD51, CD30, CD32, CD40, CD49b, CD39, CD49c, CD62E, CD11c, CD35, CD37, CD24, CD62P, CD51_61, CD11b, CD16, CD79b, CD86, CD34, CD45RA, CD13, CD57, CD74, CD26, CD83, CD93, CD87, CD49e, CD63, …
CD4SP1ap	CD66b, CD70, CD14, CD22, CD80, CD79a, CD85d, CD29, CD85k, CD19, CD91, CD36, CD85j, CD33, CD23, CD56_LT56, CD61, CD20, CD68, CD51, CD73, CD30, CD72, CD35, CD42b, CD66a_c_d_e, CD32, CD62E, CD41, CD39, CD11c, CD49b, FMO, CD42a, CD40, CD79b, CD66c, CD15, CD24, CD51_61, CD16, CD11b, CD62P, CD37, CD64, CD89, CD49c, CD49a, CD21, CD74, CD57, CD13, CD34, CD93, CD86, CD83, CD63, CD54, CD87, CD10, CD25, CD1…
CD4SP1am	FMO, CD79a, CD56_LT56, CD61, CD89, CD42a, CD70, CD19, CD80, CD66b, CD68, CD15, CD22, CD29, CD14, CD23, CD64, CD72, CD66c, CD36, CD21, CD85j, CD42b, CD20, CD91, CD51, CD32, CD85k, CD62E, CD1d, CD40, CD35, CD33, CD41, CD51_61, CD79b, CD11c, CD24, CD16, CD10, CD37, CD11b, CD85d, CD66a_c_d_e, CD30, CD62P, CD49b, CD13, CD34, CD57, CD74, CD8_HIT8a, CD1a, CD63, CD73, CD86, CD39, CD93, CD87, CD83, CD49c,…
CD8SP1ap	CD29, CD23, CD33, CD56_LT56, CD66b, CD66a_c_d_e, CD30, CD61, CD91, CD14, CD32, CD72, CD39, CD66c, CD70, CD21, CD42a, CD22, CD42b, CD15, CD24, CD79a, CD51, CD62E, CD37, CD51_61, CD16, CD19, CD36, CD41, CD49c, CD62P, CD64, CD68, CD80, CD85d, CD85j, CD85k, CD89, FMO, CD35, CD11c, CD11b, CD20, CD49b, CD40, CD13, CD57, CD34, CD79b, CD93, CD49a, CD83, CD88, CD87, CD86, CD25, CD74, CD1d, CD71, CD63, CD9…
CD8SP1am	CD61, CD29, CD70, CD64, CD85k, CD33, CD91, CD66b, CD36, CD80, CD22, CD72, CD66a_c_d_e, CD1d, CD66c, CD14, CD56_LT56, CD23, CD68, CD42b, CD19, CD20, CD41, CD15, CD62E, CD79a, CD85j, CD32, CD30, CD51, CD37, FMO, CD42a, CD24, CD51_61, CD16, CD40, CD79b, CD35, CD62P, CD85d, CD89, CD49b, CD39, CD93, CD34, CD11c, CD11b, CD57, CD49c, CD13, CD86, CD21, CD83, CD74, CD25, CD87, CD10, CD88, CD71, CD96, CD49…
